# Supplementary material for: Activation of PPARγ and inhibition of cell proliferation reduces key proteins associated with the basal subtype of bladder cancer in As3+-transformed UROtsa cells
Source: PubMed Central journal article supplement (PMC7444546; doi:10.1371/journal.pone.0237976), 2020-08-21

Uncropped blots used to generate Figure 2

**A**

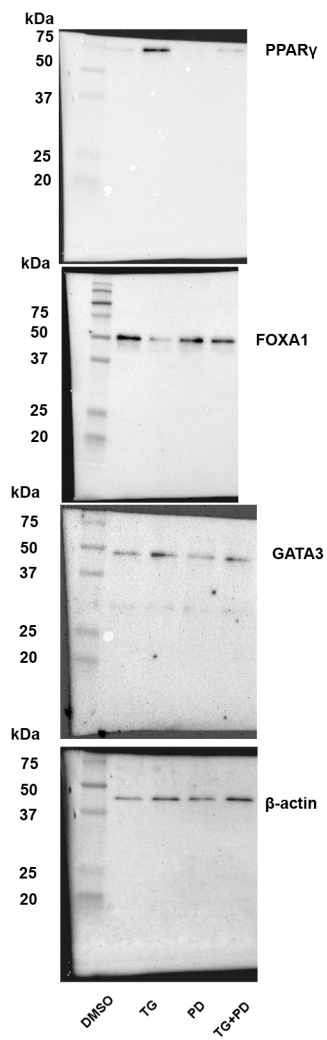

**B**

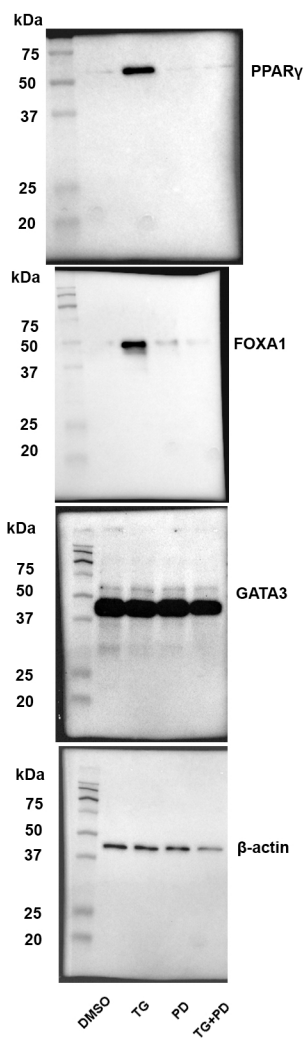

**C**

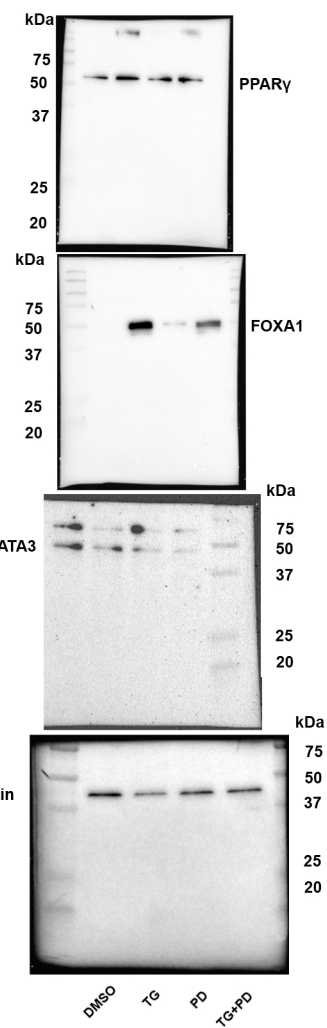

# Uncropped blots used to generate Figure 3

**A**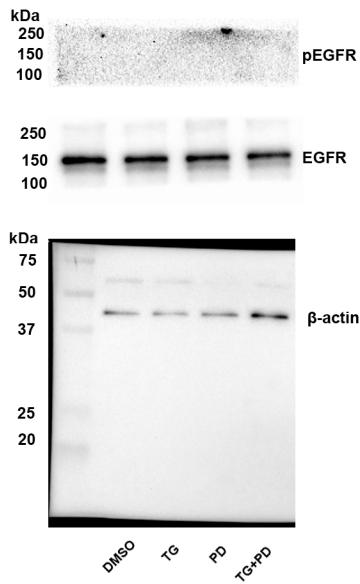**B**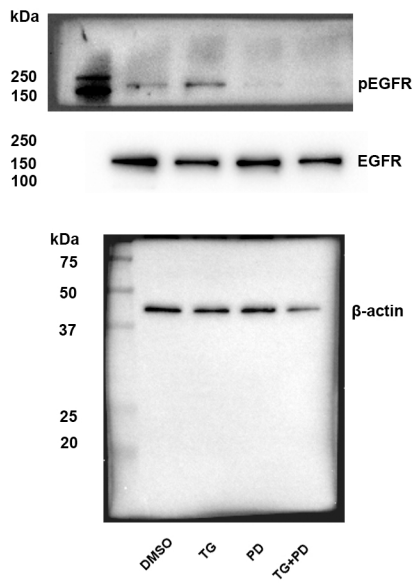**C**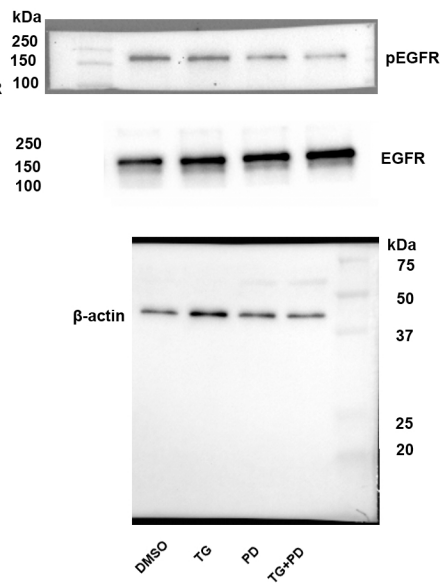

Uncropped blots used to generate Figure 5

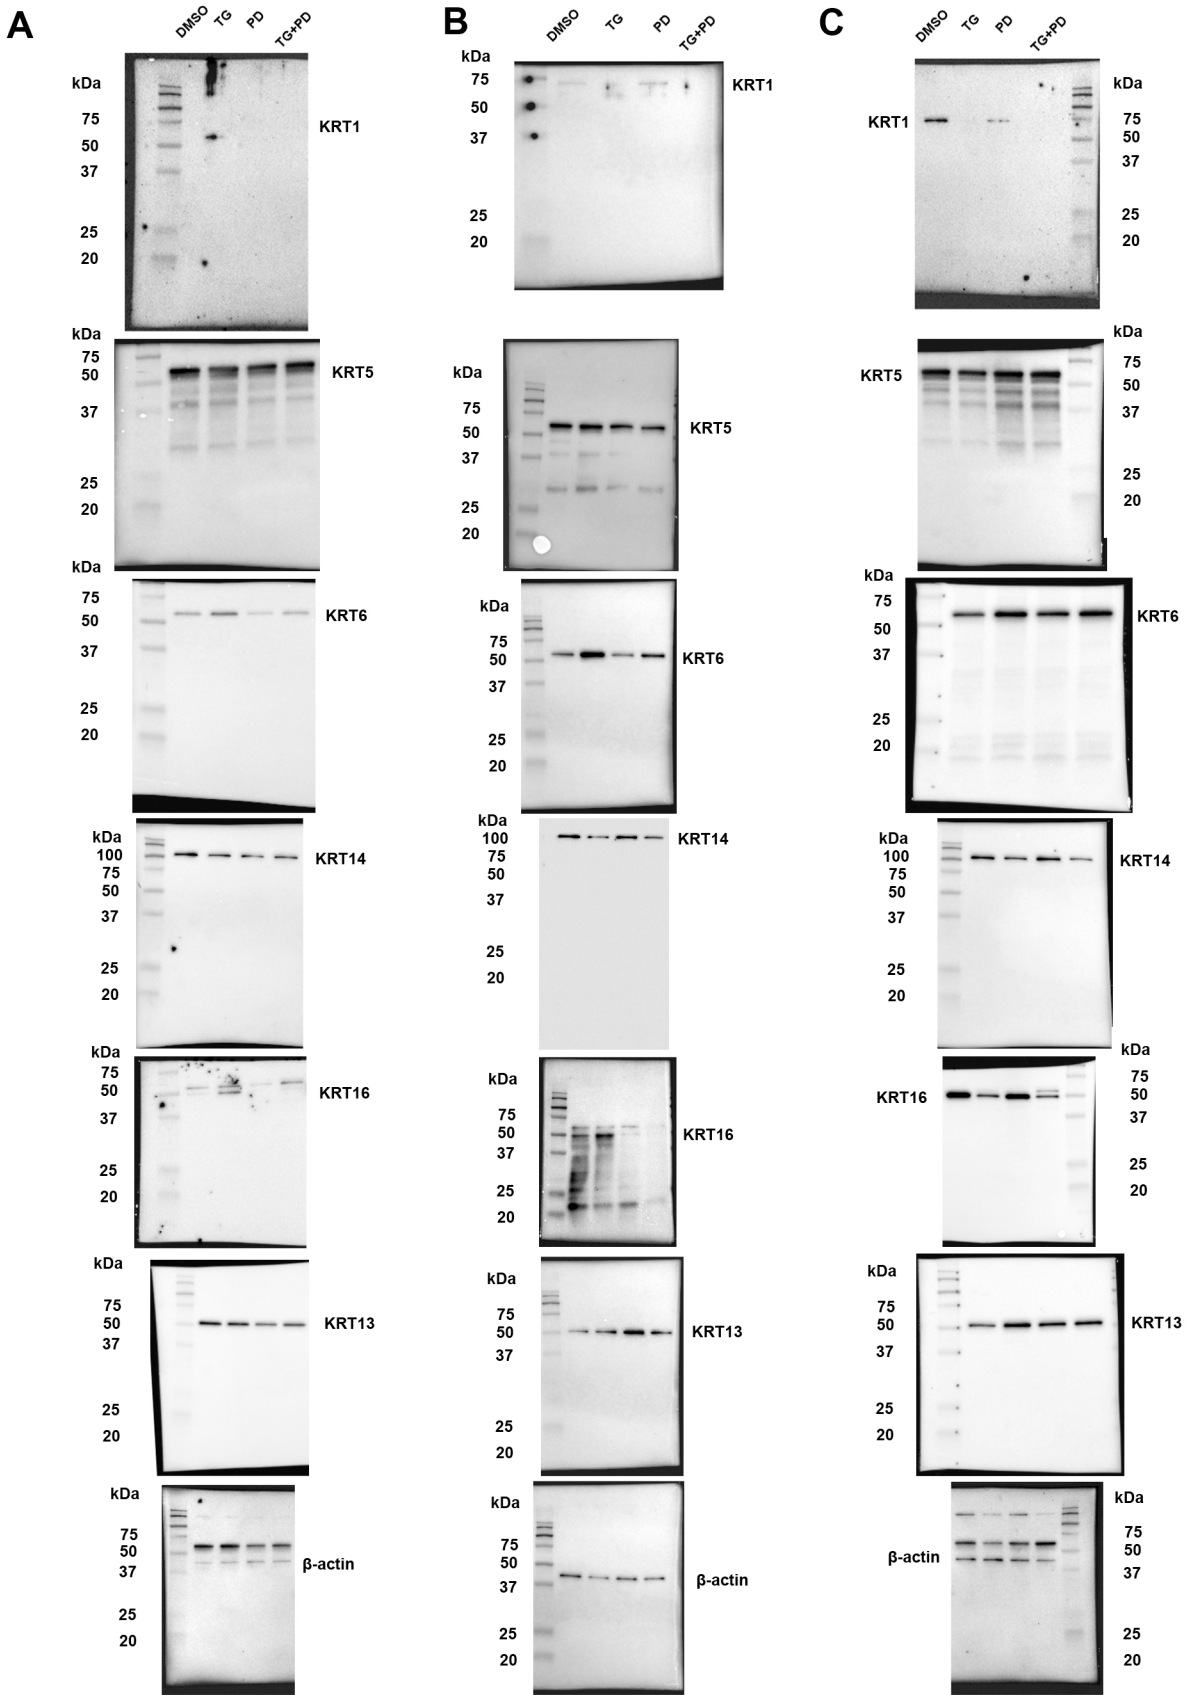

# Uncropped blots used to generate Figure 6

## A

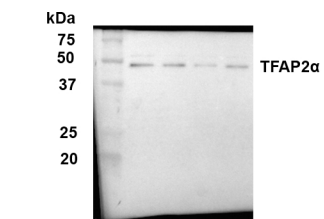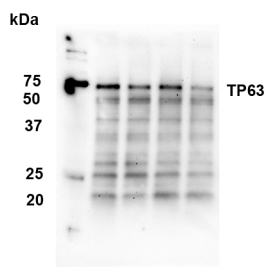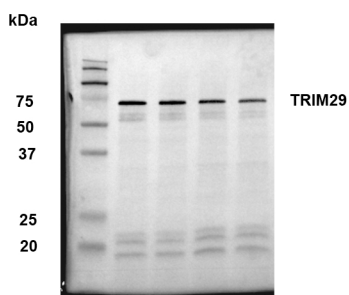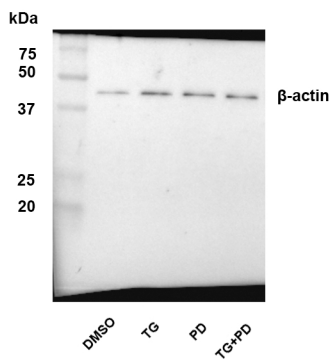

## B

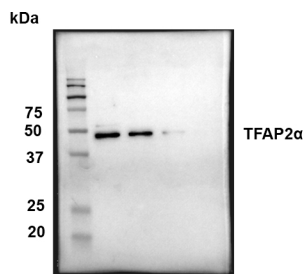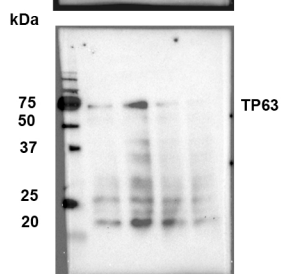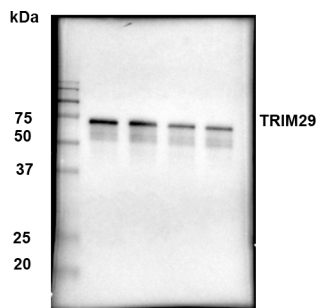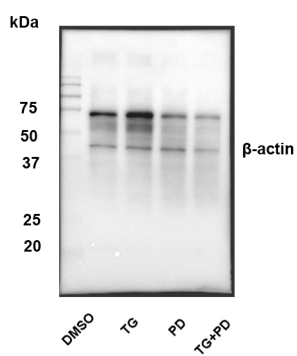

## C

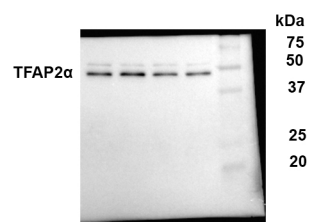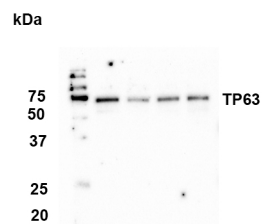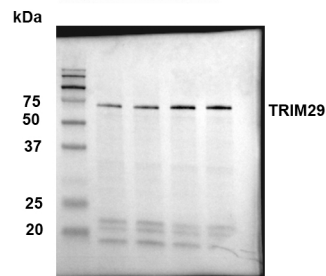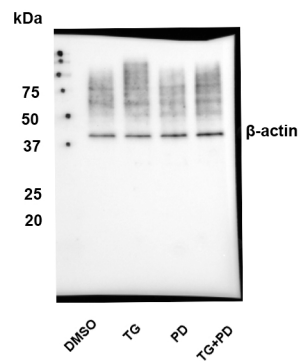

Supplement: pone.0237976.s004.pdf [file pone.0237976.s004.pdf]
